# Supplementary material for: The Southern Hemisphere at glacial terminations: insights from the Dome C ice core
Source: Copernicus journal article supplement (doi:10.5194/cp-4-345-2008), 2008-12-09
Supplement: Supplementary file 1 [file cp-4-345-2008-supplement.pdf]

THE SOUTHERN HEMISPHERE AT GLACIAL TERMINATIONS: INSIGHTS FROM THE DOME C ICE CORE BY REGINE RÖTHLISBERGER ET AL., CLIM. PAST, 2008.

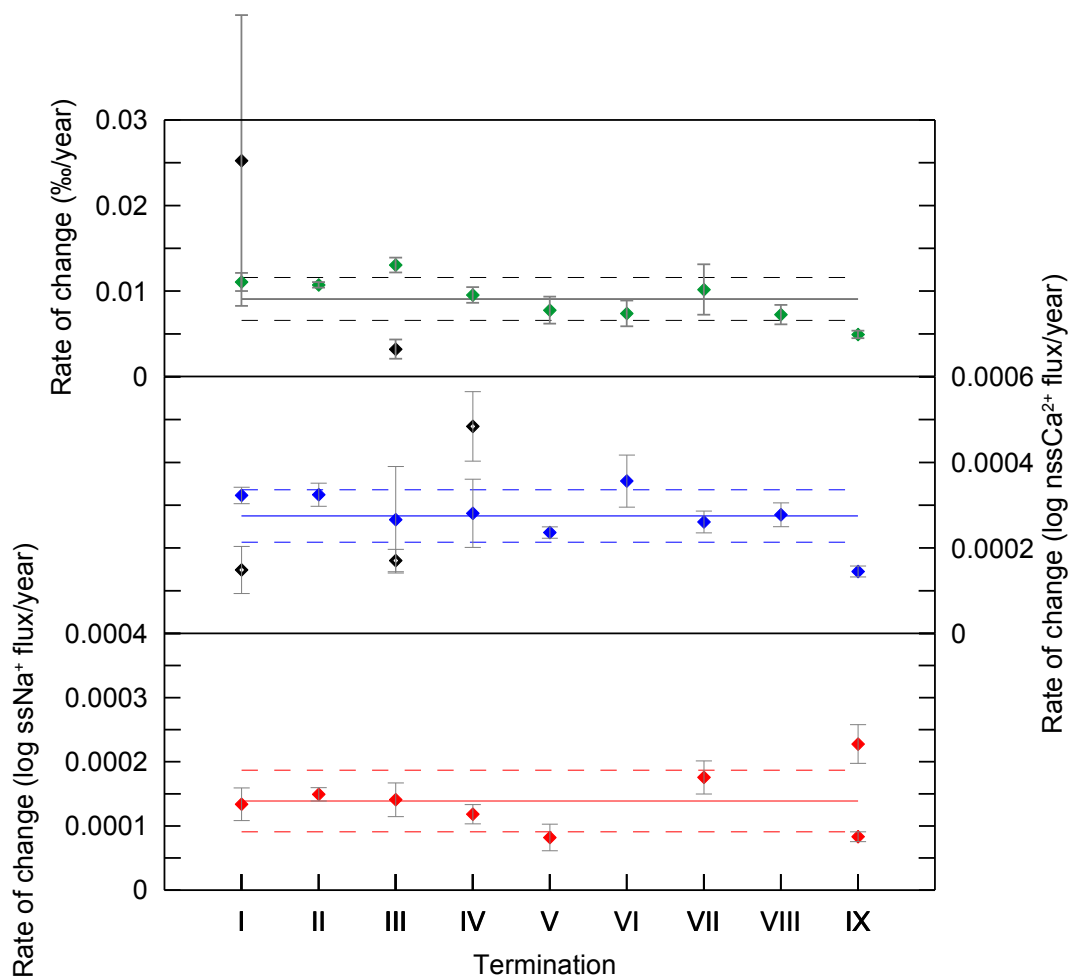

Figure S1. Rate of change calculated based on termination ramps in  $\delta D$ ,  $nssCa^{2+}$  flux and  $ssNa^+$  flux. For some terminations, two ramps were fitted to the data (see Fig. 4 and Table 1), and the rate of change has been calculated for each ramp separately. Error bars correspond to one standard error. The black diamonds at T I correspond to the younger part of T I. The early part of Termination III seems to be exceptionally slow (black diamond) compared to the other terminations (see also Fig. 4). Also, Termination IX seems to progress slower than average. The horizontal lines represent the average rate of change (solid) plus/minus one standard deviation (dashed), calculated from all data except the black data points.

Table S1. Input parameters required to run RAMPFIT. n: number of data points, t(1): start of interval, t(n): end of interval, STD fit: standard deviation of data, either constant or a ramp (first level until the time given, then second level from time given), k: number of points used for running averages, t1-t2 search: intervals within which t1/t2 were chosen from. Of major importance for the resulting estimates are t(1) and t(n), the limits of the section of data that is approximated by a ramp. The standard deviation is used for the weighted regression, but resulting change points are only minimally influenced by choices of STD fit.

| Variable   | Termination | n    | t(1)   | t(n)   | STD fit                       | k  | t1-t2 search                    |
|------------|-------------|------|--------|--------|-------------------------------|----|---------------------------------|
| logssNafl  | Ia          | 319  | 8000   | 14500  | 0.06 const                    | 25 | 10000-13500/<br>12000-14500     |
| lognssCafl | Ia          | 319  | 8000   | 14500  | 0.1 const                     | 15 | full                            |
| lognssCafl | Ib          | 332  | 13000  | 20000  | 0.12-14500/<br>0.08-16000     | 25 | 13000-16000/<br>16000-20000     |
| $\delta D$ | Ia          | 305  | 8000   | 14500  | 5 const                       | 5  | 8000-12500/<br>11000-14500      |
| $\delta D$ | Ib          | 202  | 13000  | 20000  | 4.5 const                     | 5  | full                            |
| logssNafl  | II          | 491  | 128000 | 138000 | 0.12-130000/<br>0.05-134000   | 25 | 128000-132000/<br>132000-136000 |
| lognssCafl | II          | 491  | 128000 | 138000 | 0.2-132000/<br>0.08-135000    | 25 | 130000-134000/<br>134000-138000 |
| $\delta D$ | II          | 182  | 128000 | 138000 | 4.5 const                     | 5  | full                            |
| logssNafl  | IIIa        | 298  | 241700 | 248000 | 0.1-243000/<br>0.05-245000    | 25 | 241000-245000/<br>245000-248000 |
| lognssCafl | IIIa        | 298  | 241700 | 248000 | 0.3-243000/<br>0.1-246000     | 25 | 244000-247000/<br>246000-248000 |
| lognssCafl | IIIb        | 344  | 247000 | 254000 | 0.1 const                     | 25 | full                            |
| $\delta D$ | IIIa        | 61   | 241700 | 248000 | 4 const.                      | 5  | full                            |
| $\delta D$ | IIIb        | 40   | 247000 | 254000 | 4 const.                      | 5  | full                            |
| logssNafl  | IV          | 362  | 334300 | 342000 | 0.05 const                    | 25 | full                            |
| lognssCafl | IVa         | 381  | 332000 | 340000 | 0.2-336000/<br>0.1-337000     | 25 | full                            |
| lognssCafl | IVb         | 237  | 338000 | 343000 | 0.08 const                    | 25 | full                            |
| $\delta D$ | IV          | 64   | 332000 | 343000 | 4 const.                      | 5  | full                            |
| logssNafl  | V           | 378  | 425500 | 434000 | 0.03 const                    | 25 | 425000-430000/<br>427000-432000 |
| lognssCafl | V           | 668  | 420000 | 435000 | 0.15-422000/<br>0.07-430000   | 25 | 424000-427000/<br>429000-433000 |
| $\delta D$ | V           | 41   | 420000 | 435000 | 4 const.                      | 5  | full                            |
| lognssCafl | VI          | 977  | 524000 | 533000 | 0.125-529000/<br>0.075-530000 | 25 | 527000-530000/<br>530000-533000 |
| $\delta D$ | VI          | 25   | 524000 | 534000 | 4 const.                      | 3  | full                            |
| logssNafl  | VII         | 360  | 625000 | 631000 | 0.015 const                   | 15 | 625000-627000/<br>627000-631000 |
| lognssCafl | VII         | 506  | 624000 | 633000 | 0.06-629000/<br>0.04-630000   | 15 | 624000-628000/<br>629000-633000 |
| $\delta D$ | VII         | 21   | 620000 | 640000 | 4 const.                      | 3  | full                            |
| lognssCafl | VIII        | 1034 | 734000 | 745000 | 0.08 const                    | 15 | 736000-740000/<br>740000-743000 |
| $\delta D$ | VIII        | 20   | 734000 | 745000 | 4 const.                      | 3  | full                            |
| logssNafl  | IXa         | 240  | 786800 | 789500 | 0.015 const                   | 15 | full                            |
| logssNafl  | IXb         | 445  | 788300 | 794000 | 0.015 const                   | 15 | 788300-791000/<br>791000-794000 |
| lognssCafl | IX          | 758  | 788000 | 799000 | 0.075 const                   | 15 | full                            |
| $\delta D$ | IX          | 21   | 786000 | 802000 | 4 const.                      | 3  | full                            |
